# Supplementary material for: Understanding the Effect of Side Reactions on the Recyclability of Furan–Maleimide Resins Based on Thermoreversible Diels–Alder Network
Source: MDPI journal article supplement (doi:10.3390/polym15051106), 2023-02-23
Supplement: s1 [file s1]

Supplementary Information

# Understanding the Effect of Side Reactions on the Recyclability of Furan-Maleimide Resins Based on Thermoreversible Diels-Alder Network

Brandon T. McReynolds <sup>1,†</sup>, Kavon D. Mojtabai <sup>2,†</sup>, Nicole Penners <sup>2</sup>, Gaeun Kim <sup>2</sup>, Samantha Lindholm <sup>2</sup>, Youngmin Lee <sup>2</sup>, John D. McCoy, and Sanchari Chowdhury <sup>2,\*</sup>

<sup>1</sup> Department of Chemical Engineering

<sup>2</sup> Department of Materials and Metallurgical Engineering

New Mexico Institute of Mining and Technology, Socorro, NM

\* Correspondence: sanchar.chowdhury@nmt.edu, youngmin.lee@nmt.edu, and john.mccoy@nmt.edu

† These authors contributed equally to this work.

**Citation:** To be added by editorial staff during production.

Academic Editor: Firstname Last-name

Received: date

Revised: date

Accepted: date

Published: date

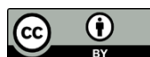

**Copyright:** © 2023 by the authors.

Submitted for possible open access publication under the terms and conditions of the Creative Commons Attribution (CC BY) license (<https://creativecommons.org/licenses/by/4.0/>).

**Table S1.** Property table with molecular weight, specific volume, and molar volume

| Precursor | Molar Mass (g/mol) | Specific Volume (mL/g) | Molar Volume (mL/mol) |
|-----------|--------------------|------------------------|-----------------------|
| ED-600    | 528                | 0.966                  | 510                   |
| T-403     | 486                | 1.02                   | 496                   |
| FGE       | 154                | 0.891                  | 137                   |
| FA4       | 1145               | 0.926                  | 1060                  |
| MPM       | 358                | 0.749                  | 268                   |
| 3M        | 726                | 0.890                  | 646                   |

**Table S2.** Molarity of furan and maleimide moieties in the DA polymers

| DA Polymer<br>( $r = \text{nominal}$ ) | [M] (mol/L) | [F] (mol/L) | Precise $r =$<br>[M]/[F] | [M] (mol/L) | [F] (mol/L) |
|----------------------------------------|-------------|-------------|--------------------------|-------------|-------------|
| FA4-MPM(0.4)                           | 1.26        | 3.14        | 0.384                    | 1.21        | 3.16        |
| FA4-MPM(0.6)                           | 1.74        | 2.90        | 0.573                    | 1.68        | 2.93        |
| FA4-MPM(0.8)                           | 2.15        | 2.69        | 0.777                    | 2.10        | 2.71        |
| FA4-MPM(1.0)                           | 2.51        | 2.51        | 0.968                    | 2.45        | 2.53        |
| FA4-3M(1.0)                            | 2.08        | 2.08        | ~1.0                     |             |             |

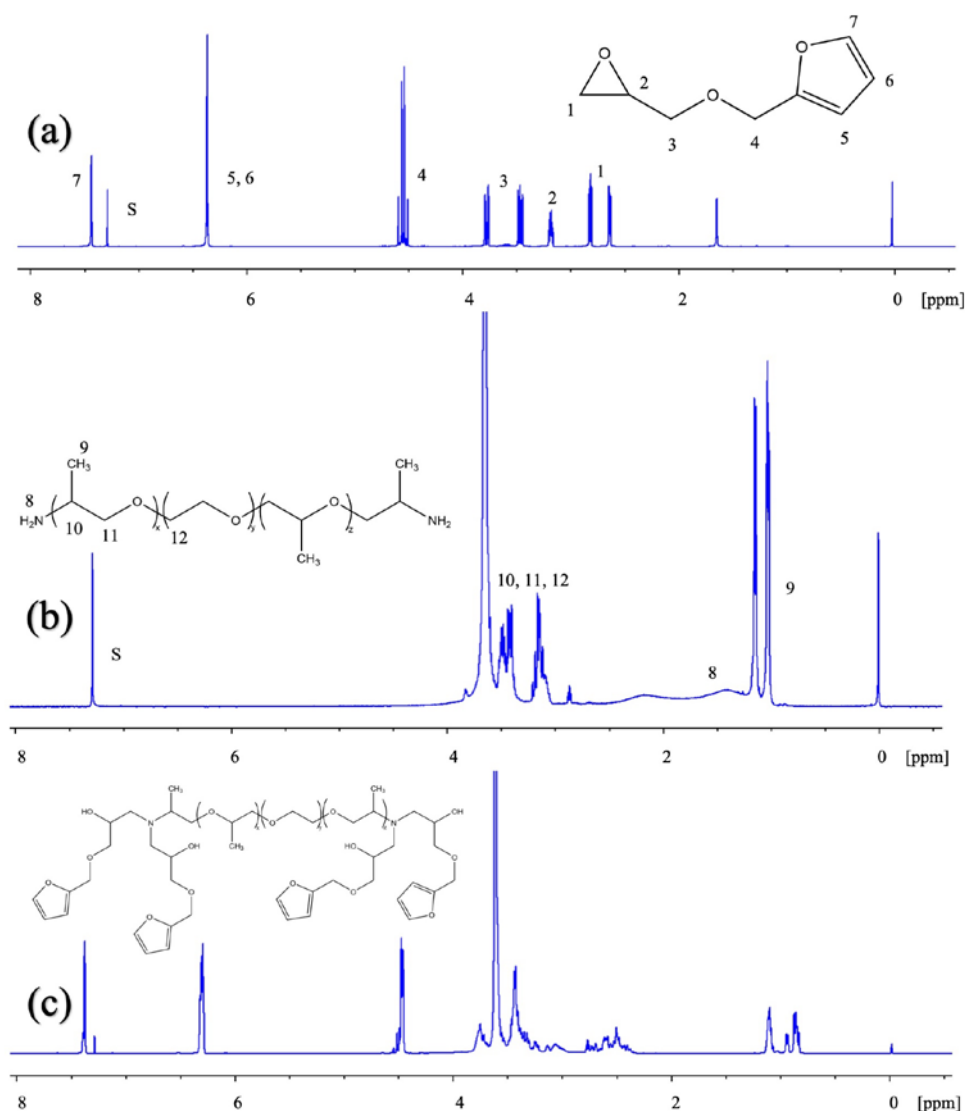**Figure S1.**  $^1\text{H}$ -NMR spectra and assignments of (a) FGE, (b) Jeffamine ED-600 and (c) FA4.

NMR scans were performed using a Bruker Avance III 400 in deuterated chloroform solution. **Figure S1** represents the  $^1\text{H}$ -NMR spectra of FA4 and its precursors. The broad signal present from 1.2 ppm to 1.75 ppm in Jeffamine ED-600 is attributed to the amine hydrogens. It is crucial that the epoxy-amine reaction is complete as the unreacted amine can undergo a Michael addition reaction with maleimide to form an irreversible network. The amine chemical peak shift cannot be observed in FA4, signifying that the epoxy-amine reaction is complete.

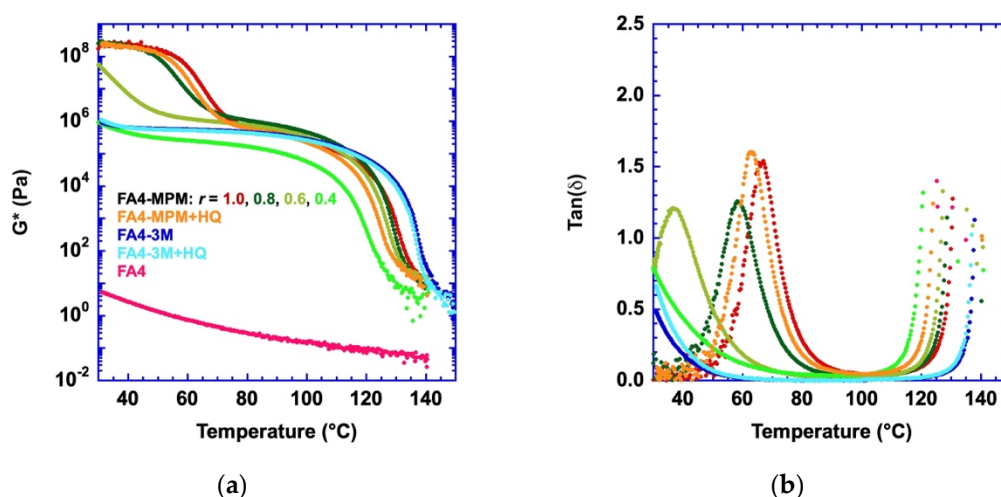

**Figure S2.** Samples corresponding to **Figure 1(a)** and **Figure 9(a)** that were initially cooled from 140 – 150°C plotting (a) Complex viscoelastic modulus and (b)  $\tan(\delta)$ .

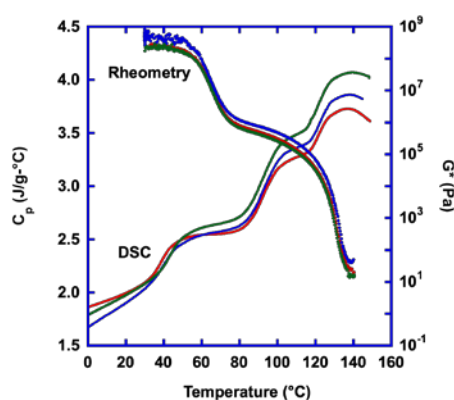

**Figure S3.** FA4-MPM samples run in triplicate to confirm reproducibility of characteristic features from DSC (10°C/min) and rheometry (2°C/min)
